# Supplementary material
Source: HighWire-hosted journal article supplement (https://ez-admanager.com/highwire/filestream/135060/field_highwire_adjunct_files/0/ruegg_1572.pdf)
Supplement: ruegg_1572.pdf [file ruegg_1572.pdf]

# Inmunoterapia para la epilepsia farmacorresistente

¿Listos para empezar?

Stephan Rüegg, MD  
Jessica A. Panzer, MD,  
PhD

Dirección para correspondencia al  
Dr. Rüegg:  
Stephan.Rueegg@usb.ch

*Neurology*® 2014;82:1572–1573

A pesar de la introducción de casi 20 nuevas drogas antiepilépticas en las últimas décadas, aproximadamente un 30% de los pacientes con epilepsia tienen crisis farmacorresistentes. Aunque muchos trastornos genéticos y lesiones cerebrales estructurales son causas conocidas de epilepsia difícil de tratar, algunos pacientes refractarios no entran en estas categorías. En la búsqueda de otros factores etiológicos, las interacciones múltiples y cercanas entre el sistema inmune y la epilepsia han ganado interés sustancial.<sup>1</sup>

El primer paso importante en la historia del sistema inmune ha sido el descubrimiento de los auto-anticuerpos (auto-Acs) contra el subtipo GluR3 de los receptores de glutamato en la encefalitis de Rasmussen, una encefalopatía epiléptica progresiva inflamatoria rara y severa.<sup>2</sup> Aunque luego se rechazó la existencia de un rol para este anticuerpo, el reporte llevó a la introducción de la inmunoterapia (IT) en algunos síndromes epilépticos farmacorresistentes (EFR)<sup>3</sup> e impulsó una búsqueda intensiva de auto-Acs en epilepsia. Los descubrimientos de encefalitis límbicas (EL) asociadas con auto-Acs contra la membrana plasmática neuronal (receptores, canales iónicos) o proteínas intracelulares han impulsado más aún esta búsqueda. Como las crisis son una manifestación clave de la EL, estos trastornos sirven como modelo para entender la interacción epilepsia-sistema inmune,<sup>4</sup> evocando la posibilidad de que dichos anticuerpos podrían causar crisis en pacientes con epilepsia solamente, y llevando a la búsqueda de auto-Acs en pacientes con EFR.<sup>5</sup> De hecho, un estudio prospectivo reciente encontró auto-Acs neuronales en cerca de un 10% de pacientes pediátricos con crisis de reciente comienzo, una tasa dos veces más alta que en controles con otras enfermedades sistémicas.<sup>6</sup>

Las consecuencias de tener una prueba positiva para estos auto-Acs no están claras, ya que se desconoce su rol fisiopatológico en la epileptogénesis. Un dilema similar enfrentan los psiquiatras con respecto a la psicosis, otra característica de la EL que raramente puede aparecer aislada.<sup>7</sup> Varios estudios en busca de auto-Acs en pacientes con psicosis o esquizofrenia han dado resultados conflictivos. Una respuesta concluyente requiere

de estudios prospectivos en pacientes con psicosis estrictamente definida de inicio reciente.<sup>8</sup> Este estudio de auto-Acs en EFR se enfrenta a un dilema similar y requiere un enfoque similar.

Una pregunta fundamental es si los pacientes con EFR posiblemente asociada a auto-Acs justifican realizar una prueba con IT. ¿Deberían ser tratados con medicación como corticoesteroides, inmunoglobulinas (IgEV), plasmaféresis u otros inmunosupresores (como azatioprina) y, de ser necesario, incluso tratamientos más agresivos con ciclofosfamida o anticuerpo monoclonal anti-pre-B-linfocitos rituximab? Estos tratamientos están asociados con severos efectos adversos, altos costos y una importante logística. Por lo tanto, el peso de la IT debe ser tomado en consideración contra la importancia de perder una causa potencialmente tratable de EFR. Este desafío es mayor debido a la dificultad de analizar objetivamente la evolución de los pacientes, ya que no hay biomarcadores confiables de la actividad epileptiforme general y los valores de auto-Acs neuronales solo reflejan la actividad de la enfermedad de forma inconsistente.

En este número de *Neurology*®, Toledano et al.<sup>9</sup> presentan un estudio retrospectivo monocéntrico en donde se evalúa la utilidad de una prueba con IT en pacientes con epilepsia presuntamente autoinmune. Identificaron 29 pacientes con EFR y auto-Acs de su gran base de datos de pacientes con epilepsia, de los cuales 26 tenían al menos un auto-Ac neuronal. Los pacientes recibieron metilprednisolona EV, IgEV o ambas, secuencialmente; en pocos casos se utilizó plasmaféresis, azatioprina o micofenolato. Solo la mitad de los pacientes respondieron al primer tratamiento dado y casi la mitad de los no respondedores mejoraron luego de la administración de un segundo agente. Las tasas de respuesta fueron mayores en pacientes con anticuerpos contra antígenos de membrana plasmática (93%) que en pacientes con antígenos intracelulares o sin anticuerpos (33%), mientras que el retraso en el tratamiento fue un factor pronóstico negativo. La IT oral a largo plazo llevó a una reducción sostenida de las crisis en > 80% de los respondedores durante 6 meses. Estos resultados son consistentes con la

Véase pág. 3

De la Division of Clinical Neurophysiology (S.R.), Department of Neurology, University Hospital of Basel, Switzerland; la Division of Neurology (J.A.P.), Children's Hospital of Philadelphia; y la University of Pennsylvania Perelman School of Medicine (J.A.P.), Hospital of the University of Pennsylvania, Philadelphia.

Ir a [Neurology.org](http://Neurology.org) para declaraciones de intereses completas. La información sobre fondos y aquellas declaraciones relevantes para los autores, si existiesen, se encuentran al final del editorial.

conocida respuesta a la IT mostrada por pacientes con auto-Acs contra antígenos de la superficie neuronal, como el receptor de NMDA.<sup>10</sup> Los autores proponen un algoritmo de manejo lógico para tales pacientes, apoyado por sus datos y por datos previos.

Aunque la recolección de datos retrospectiva de este estudio en un solo centro tiene varios sesgos, incluso el sesgo de referencia y la elección del tratamiento, los autores deberían ser felicitados por su esfuerzo para definir un algoritmo de selección relativamente uniforme para pacientes con una EFR autoinmune presunta.

A pesar de este algoritmo, la población de pacientes es heterogénea, con diferencias en el tipo de auto-Ac y variación en la duración de la enfermedad. Esta heterogeneidad tal vez haga que la importante respuesta al tratamiento sea aún más valiosa. Una limitación importante de este estudio es la cuantificación imprecisa de la medida de resultado más importante: la frecuencia de crisis. En vez de un número basal de crisis, se utiliza un sistema categórico (crisis diarias/semanales/mensuales). A pesar de estas categorías tan amplias, se utiliza la reducción numérica de la frecuencia de crisis para distinguir entre respondedores y no respondedores. Además, no queda claro si la respuesta a la IT puede ser utilizada para diagnosticar una epilepsia autoinmune. Algunos pacientes con un trastorno aparentemente autoinmune no respondieron al tratamiento – ¿tienen o no una epilepsia autoinmune? ¿O son refractarios al tratamiento? Además, la IT tiene efectos directos anticonvulsivos en trastornos sin una base autoinmune presunta, como el tratamiento de los espasmos infantiles con hormona adrenocorticotrópica y prednisona. Por lo tanto, el uso de la respuesta a la IT para diagnosticar epilepsia autoinmune puede llevar tanto a falsos positivos como a falsos negativos.

A pesar de estas limitaciones, este estudio es un paso crucial hacia el descubrimiento del rol de la IT en pacientes con presunta EFR autoinmune y los hallazgos retrospectivos actuales justifican considerar una prueba de IT en estos pacientes. Estos resultados son el fundamento para un ensayo aleatorizado y controlado de IT en la epilepsia presuntamente autoinmune, que compararía grupos de tratamiento estandarizados, eliminando sesgos referidos a la elección del tratamiento y la severidad de la enfermedad. Este estudio también debería abrir el paso para estudios prospectivos adicionales en relación con la historia natural de

la EFR autoinmune y para que se tome conciencia del rol de la IT en el tratamiento de epilepsias refractarias.

## CONTRIBUCIONES DE LOS AUTORES

Stephan J. Rüegg: borrado/revisión del manuscrito, concepto o diseño del estudio. Jessica Panzer: borrado/revisión del manuscrito.

## FONDOS PARA EL ESTUDIO

No se reportan aportes de fondos.

## DECLARACIÓN DE INTERESES

S. Rüegg recibió becas para investigación incondicionales de UCB. Recibió honorarios por servir en los comités de consejo científico de Desitin, Eisai, GlaxoSmithKline y UCB, becas de viaje de GlaxoSmithKline, Janssen-Cilag y UCB, y fondos por disertar de UCB y por servir como consultor para Eisai, GlaxoSmithKline, Janssen-Cilag, Pfizer, Novartis y UCB. Es coaplicante de Swiss National Found grants (#33CM30-124-115/1 and #33CM30-140-338/1). Sirvió en el comité de la Swiss League against Epilepsy y está en el comité editorial de *Epileptologie* y el *Swiss EEG Bulletin*. No tiene ninguna acción de una compañía farmacéutica o manufactura de dispositivos médicos. J.A. Panzer recibió una beca de formación del NIH (T32NS007413) y de la Philadelphia Foundation. Ella no tiene acciones en ninguna compañía farmacéutica o manufactura de dispositivos médicos. Ir a [Neurology.org](http://Neurology.org) para declaraciones completas.

## BIBLIOGRAFÍA

1. Vezzani A, French J, Bartfai T, Baram TZ. The role of inflammation in epilepsy. *Nat Rev Neurol* 2011;7:31–40.
2. Rogers SW, Andrews PI, Gahring LC, et al. Autoantibodies to glutamate receptor GluR3 in Rasmussen's encephalitis. *Science* 1994;265:648–651.
3. Andrews PI, Dichter MA, Berkovic SF, Newton MR, McNamara JO. Plasmapheresis in Rasmussen's encephalitis. *Neurology* 1996;46:242–246.
4. Bien CG, Vincent A, Barnett MH, et al. Immunopathology of autoantibody-associated encephalitides: clues for pathogenesis. *Brain* 2012;135:1622–1638.
5. Brenner T, Sills GJ, Hart Y, et al. Prevalence of neurologic autoantibodies in cohorts of patients with new and established epilepsy. *Epilepsia* 2013;54:1028–1035.
6. Suleiman J, Wright S, Gill D, et al. Autoantibodies to neuronal antigens in children with new-onset seizures classified according to the revised ILAE organization of seizures and epilepsies. *Epilepsia* 2013;54:2091–2100.
7. Kayser MS, Titulaer MJ, Gresa-Arribas N, Dalmau J. Frequency and characteristics of isolated psychiatric episodes in anti-N-methyl-D-aspartate receptor encephalitis. *JAMA Neurol* 2013;70:1133–1139.
8. Panzer JA, Gleichman AJ, Lynch DR. Glutamatergic autoencephalitides: an emerging field. *J Neural Transm* Epub Jan 9, 2014.
9. Toledano M, Britton JW, McKeon A, et al. Utility of an immunotherapy trial in evaluating patients with presumed autoimmune epilepsy. *Neurology* 2014;82:1578–1586.
10. Titulaer MJ, McCracken L, Gabilondo I, et al. Treatment and prognostic factors for long-term outcome in patients with anti-NMDA receptor encephalitis: an observational cohort study. *Lancet Neurol* 2013;12:157–166.
